# Supplementary material for: HandiVIH—A population-based survey to understand the vulnerability of people with disabilities to HIV and other sexual and reproductive health problems in Cameroon: protocol and methodological considerations
Source: HighWire-hosted journal article supplement (doi:10.1136/bmjopen-2015-008934), 2016-02-01
Supplement: bmjopen-2015-008934supp.pdf [file bmjopen-2015-008934supp.pdf]

## **Appendix A: Disability screening tool used in the HandiVIH cross-sectional survey:**

### **Short set of the Washington Group questionnaire<sup>47,48</sup>**

Because of a physical, mental, or emotional health condition...

1. Do you have difficulty seeing even if wearing glasses?
2. Do you have difficulty hearing even if using hearing aid/s or are you deaf?
3. Do you have difficulty walking or climbing stairs?
4. Do you have difficulty remembering or concentrating?
5. Do you have difficulty (with self-care such as) washing all over or dressing?
6. Do you have difficulty communicating (for example, understanding or being understood by others)?

**Two additional questions from the extended set of the Washington Group questionnaire were added in order to capture better people with intellectual disabilities:**

7. Do you have difficulty learning a new task, for example learning how to get to a new place?
8. Do you have difficulty analyzing and finding solutions to problems in day to day life?

Question response categories: No, Some, A lot, and Unable.

## Appendix B: the life course grid

| Année | Age (ans) | Durée (ans) | 1.1 Environnement vie |               |                |                   | Handicap |
|-------|-----------|-------------|-----------------------|---------------|----------------|-------------------|----------|
|       |           |             |                       | 1.2 Activités | 1.3 Ressources | 1.4 Préoccupation |          |
| 2014  | 26        | 0           |                       |               |                |                   |          |
| 2013  | 25        | 1           |                       |               |                |                   |          |
| 2012  | 24        | 2           |                       |               |                |                   |          |
| 2011  | 23        | 3           |                       |               |                |                   |          |
| 2010  | 22        | 4           |                       |               |                |                   |          |
| 2009  | 21        | 5           |                       |               |                |                   |          |
| 2008  | 20        | 6           |                       |               |                |                   |          |
| 2007  | 19        | 7           |                       |               |                |                   |          |
| 2006  | 18        | 8           |                       |               |                |                   |          |
| 2005  | 17        | 9           |                       |               |                |                   |          |
| 2004  | 16        | 10          |                       |               |                |                   |          |
| 2003  | 15        | 11          |                       |               |                |                   |          |
| 2002  | 14        | 12          |                       |               |                |                   |          |
| 2001  | 13        | 13          |                       |               |                |                   |          |
| 2000  | 12        | 14          |                       |               |                |                   |          |
| 1999  | 11        | 15          |                       |               |                |                   |          |
| 1998  | 10        | 16          |                       |               |                |                   |          |
| 1997  | 9         | 17          |                       |               |                |                   |          |
| 1996  | 8         | 18          |                       |               |                |                   |          |
| 1995  | 7         | 19          |                       |               |                |                   |          |

**Environment:** people with whom the respondent lived for at least one year.

*Questions asked to fill this column:*

- After your birth, who raised you up? Until what age / how long?
- Then with whom did you live? Until what age / how long?

**Main activities** since the respondent was 10 years:

*Questions :*

- What was your main activity when you were 10-years old? Until what age / how long did you do that?
- Then what did you do? Until what age / how long did you do that?

For each period of activity identified above, the respondent is asked to give the

**resources** for living he/she had during the period and to assess how much a

**preoccupation** was: his/her health, having enough to eat, having a job, having a home.

Information on the timing of the impairment onset, sexual relationships, adverse sexual events and births are also collected on the life course grid in other columns.
